# Supplementary material
Source: Research Square preprint supplement (doi:10.21203/rs.3.rs-9776754/v1)
Supplement: Supplementary file 1 [file eb355a748bdca54a6f18932c.docx]

**Monitoring arsenic in rice paddies of Malabar Coast, South Western India**

Rashbi Jahan Vellaria, Mayadevi Mullasseril Ramachandran Naira*, Divya Vijayan Vattekata, Sandeep Sasidharan Nairb, Beena Viswanathan Nair. Indirabai ammaa, Subin Kaniyamattathil Josec

aDepartment of Soil Science and Agricultural Chemistry, College of Agriculture, Kerala Agricultural University, Kerala, India

bKerala State Council for Science Technology and Environment-Kerala Forest Research Institute, Peechi, Kerala, India

cChrist College (Autonomous), Thrissur, Kerala, India

*Assistant Professor, Department of Soil Science and Agricultural Chemistry, College of Agriculture, Kerala Agricultural University, Thrissur, Kerala, India

Ph. No. 9495167312

Email: [mayadevi.mr@kau.in](mailto:mayadevi.mr@kau.in) (Mayadevi M R)

Table 1. Details of soil and irrigation water sampling locations

| AEUs | Grid No | Local Body | Distrits | Lattitude (⁰N) | Longitude (⁰E) |
| --- | --- | --- | --- | --- | --- |
|
|
| Northern coastal plain (AEU 2) | 1 | Kodungallur Municipality | Thrissur | 10.235784 | 76.182363 |
| 2 | Chavakkad Municipality | 10.605473 | 76.005414 |
| 3 | Punnayurkulam | 10.686931 | 76.001621 |
| 4 | Parappanangadi Muncipality | Malappuram | 11.057515 | 75.868137 |
| 5 | Vallikkunnu | 11.098442 | 75.860274 |
| 6 | Tanur | 11.011101 | 75.874231 |
| 7 | Tanalur | 10.960011 | 75.921123 |
| 8 | Vettam | 10.875213 | 75.905721 |
| 9 | Tripangode | 10.824639 | 75.950904 |
| 10 | Feroke Municipality | Kozhikode | 11.175189 | 75.855392 |
| 11 | Ramanattukara Municipality | 11.189165 | 75.860321 |
| 12 | Thikkoti | 11.538454 | 75.61408 |
| 13 | Payyoli | 11.523204 | 75.638063 |
| 14 | Thurayur | 11.524798 | 75.677141 |
| 15 | Maniyur | 11.549697 | 75.665044 |
| 16 | Chorodu | 11.63372 | 75.600867 |
| 17 | Eramala | 11.679936 | 75.587717 |
| 18 | Panoor | Kannur | 11.756866 | 75.586705 |
| 19 | Eranholi | 11.79488 | 75.513362 |
| 20 | Dharmadam | 11.80287 | 75.465041 |
| 21 | Chirakkal | 11.897298 | 75.346148 |
| 22 | Azhikode | 11.921162 | 75.321187 |
| 23 | Kalliasseri | 11.969176 | 75.346273 |
| 24 | Narath | 11.441838 | 75.760914 |
| 25 | Matool | 11.998628 | 75.266667 |
| 26 | Madayi | 12.04653 | 75.230549 |
| 27 | Ramanthali | 12.069545 | 75.196361 |
| 28 | Payyannur Municipality | 12.149981 | 75.209255 |
| 29 | Karivellur | 12.16941 | 75.204242 |
| 30 | Nileshwar Municipality | Kasaragod | 12.26232 | 75.163865 |
| 31 | Kanhangad Municipality | 12.281847 | 75.108417 |
| 32 | Ajanur | 12.376583 | 75.073275 |
| 33 | Udma | 12.454436 | 75.035593 |
| 34 | Chemnad | 12.468436 | 75.060714 |
| 35 | Mogralputhur | 12.525768 | 74.977223 |
| 36 | Kumbla | 12.619477 | 74.9488 |
| 37 | Mangalpady | 12.642993 | 74.925806 |
| 38 | Manjeshwar | 12.706482 | 74.902791 |
| *Kaipad* lands  (AEU 7) | 1 | Kannapuram | Kannur | 11.974084 | 75.298474 |
| 2 | Cherukunnu | 11.991673 | 75.296797 |
| 3 | Ezhome | 12.038421 | 75.291627 |
| 4 | Thrikkarippur | Kasaragod | 12.142342 | 75.186546 |
| 5 | Valiyaparamb | 12.134954 | 75.158552 |
| 6 | Pilicode | 12.211941 | 75.197431 |
| 7 | Cheruvathur | 12.21347 | 75.163115 |
| 8 | Pallikkara | 12.397095 | 75.059057 |

Table 2. Chemical properties of irrigation water collected from paddy fields of Northern coastal plain (AEU 2) and Kaipad Lands (AEU 7)

| AEUs | Grid No | Local Body | Distrits | Irrigation Water analysis | | |
| --- | --- | --- | --- | --- | --- | --- |
| pH | EC | As |
| dSm-1 | µgL-1 |
| Northern coastal plain (AEU 2) | 1 | Kodungallur Municipality | Thrissur | 7.35±0.01 | 0.58±0.02 | 1.00±0.04 |
| 2 | Chavakkad Municipality | 6.74±0.03 | 0.29±0.02 | 0.13±0.00 |
| 3 | Punnayurkulam | 6.99±0.02 | 0.52±0.03 | 0.63±0.03 |
| 4 | Parappanangadi Muncipality | Malappuram | 7.91±0.04 | 0.11±0.02 | 0.35±0.03 |
| 5 | Vallikkunnu | 5.94±0.04 | 0.18±0.01 | 0.29±0.01 |
| 6 | Tanur | 7.16±0.03 | 4.59±0.02 | 0.68±0.02 |
| 7 | Tanalur | 7.06±0.04 | 0.63±0.01 | 0.42±0.01 |
| 8 | Vettam | 6.25±0.03 | 0.22±0.01 | 0.53±0.01 |
| 9 | Tripangode | 7.01±0.04 | 0.24±0.03 | 0.09±0.00 |
| 10 | Feroke Municipality | Kozhikode | 7.36±0.04 | 0.06±0.01 | 0.03±0.01 |
| 11 | Ramanattukara Municipality | 7.74±0.02 | 0.09±0.01 | 0.03±0.02 |
| 12 | Thikkoti | 8.26±0.06 | 0.09±0.02 | 0.52±0.01 |
| 13 | Payyoli | 8.21±0.01 | 0.07±0.02 | 0.56±0.01 |
| 14 | Thurayur | 7.93±0.06 | 0.1±0.02 | 0.48±0.02 |
| 15 | Maniyur | 8.34±0.04 | 0.27±0.04 | 0.06±0.01 |
| 16 | Chorodu | 8.02±0.06 | 0.08±0.03 | 1.31±0.03 |
| 17 | Eramala | 7.41±0.04 | 0.08±0.03 | 0.15±0.01 |
| 18 | Panoor | Kannur | 7.96±0.04 | 0.06±0.01 | 1.44±0.07 |
| 19 | Eranholi | 7.42±0.02 | 0.05±0.02 | 0.26±0.01 |
| 20 | Dharmadam | 8.30±0.03 | 0.2±0.03 | 0.46±0.03 |
| 21 | Chirakkal | 7.60±0.02 | 0.07±0.02 | 0.35±0.01 |
| 22 | Azhikode | 8.38±0.04 | 0.08±0.02 | 0.40±0.02 |
| 23 | Kalliasseri | 8.50±0.05 | 0.17±0.02 | 0.05±0.02 |
| 24 | Narath | 8.22±0.02 | 0.29±0.02 | BDL |
| 25 | Matool | 8.11±0.04 | 0.06±0.02 | 1.56±0.06 |
| 26 | Madayi | 8.29±0.02 | 0.13±0.01 | BDL |
| 27 | Ramanthali | 7.47±0.04 | 0.04±0.01 | 1.01±0.05 |
| 28 | Payyannur Municipality | 7.80±0.06 | 0.82±0.01 | 0.17±0.01 |
| 29 | Karivellur | 7.43±0.03 | 0.04±0.02 | 1.38±0.03 |
| 30 | Nileshwar Municipality | Kasaragod | 8.57±0.02 | 0.47±0.04 | 0.15±0.02 |
| 31 | Kanhangad Municipality | 7.96±0.04 | 0.1±0.03 | 0.14±0.02 |
| 32 | Ajanur | 7.53±0.04 | 0.04±0.02 | 0.47±0.05 |
| 33 | Udma | 8.58±0.03 | 0.19±0.02 | 0.13±0.02 |
| 34 | Chemnad | 7.60±0.03 | 0.03±0.01 | 0.03±0.01 |
| 35 | Mogralputhur | 7.63±0.06 | 0.03±0.01 | 0.14±0.02 |
| 36 | Kumbla | 7.86±0.01 | 0.06±0.02 | 0.10±0.01 |
| 37 | Mangalpady | 8.06±0.06 | 0.15±0.02 | BDL |
| 38 | Manjeshwar | 7.84±0.04 | 0.04±0.02 | BDL |
| *Kaipad* lands  (AEU 7) | 1 | Kannapuram | Kannur | 8.58±0.04 | 1.11±0.02 | 0.72±0.04 |
| 2 | Cherukunnu | 8.60±0.04 | 8.23±0.04 | 4.67±0.15 |
| 3 | Ezhome | 7.98±0.06 | 17.04±0.03 | 0.33±0.01 |
| 4 | Thrikkarippur | Kasaragod | 7.86±0.02 | 0.09±0.04 | 0.13±0.02 |
| 5 | Valiyaparamb | 8.40±0.06 | 0.14±0.03 | 0.59±0.05 |
| 6 | Pilicode | 7.46±0.04 | 0.02±0.01 | 0.83±0.01 |
| 7 | Cheruvathur | 8.60±0.04 | 0.46±0.03 | 0.08±0.01 |
| 8 | Pallikkara | 7.97±0.05 | 0.04±0.01 | BDL |
| Data presented are the mean (±Standard Error) of three replicates. | | | | | | |

Table 3. Chemical properties (pH, electrical conductivity (EC) and Organic Carbon) of surface (0-15cm) soil samples collected from paddy fields of Northern coastal plain (AEU 2) and *Kaipad* Lands (AEU 7) agro ecological units

| Agro ecological units  (AEU) | Grid No | Local Body | pH | EC | Organic carbon  (WBC) |
| --- | --- | --- | --- | --- | --- |
| dSm-1 | % |
| Northern coastal plain (AEU 2) | 1 | Kodungallur Municipality | 5.95±0.05 | 1.47±0.02 | 1.26±0.02 |
| 2 | Chavakkad Municipality | 3.08±0.02 | 4.46±0.02 | 5.33±0.03 |
| 3 | Punnayurkulam | 4.04±0.06 | 0.75±0.02 | 0.77±0.02 |
| 4 | Parappanangadi Muncipality | 5.25±0.03 | 0.39±0.03 | 3.03±0.01 |
| 5 | Vallikkunnu | 4.40±0.04 | 0.67±0.02 | 1.40±0.03 |
| 6 | Tanur | 4.50±0.05 | 0.61±0.02 | 1.75±0.03 |
| 7 | Tanalur | 6.35±0.04 | 0.28±0.03 | 0.90±0.02 |
| 8 | Vettam | 5.27±0.04 | 1.00±0.0 | 1.02±0.03 |
| 9 | Tripangode | 4.69±0.04 | 0.38±0.03 | 1.47±0.05 |
| 10 | Feroke Municipality | 4.83±0.03 | 0.52±0.01 | 2.54±0.03 |
| 11 | Ramanattukara Municipality | 4.74±0.04 | 0.72±0.04 | 2.46±0.03 |
| 12 | Thikkoti | 4.50±0.02 | 0.11±0.02 | 0.76±0.02 |
| 13 | Payyoli | 4.91±0.04 | 0.42±0.03 | 1.85±0.03 |
| 14 | Thurayur | 4.21±0.04 | 0.47±0.03 | 1.92±0.04 |
| 15 | Maniyur | 4.86±0.04 | 0.41±0.03 | 1.01±0.03 |
| 16 | Chorodu | 6.28±0.02 | 0.07±0.02 | 0.53±0.03 |
| 17 | Eramala | 6.35±0.03 | 0.35±0.03 | 0.65±0.02 |
| 18 | Panoor | 7.13±0.03 | 0.10±0.02 | 0.35±0.03 |
| 19 | Eranholi | 5.48±0.03 | 0.14±0.02 | 3.19±0.05 |
| 20 | Dharmadam | 6.25±0.05 | 0.27±0.03 | 1.09±0.04 |
| 21 | Chirakkal | 4.17±0.03 | 0.44±0.03 | 2.33±0.04 |
| 22 | Azhikode | 5.79±0.03 | 0.52±0.03 | 0.19±0.03 |
| 23 | Kalliasseri | 5.78±0.03 | 0.24±0.02 | 0.43±0.04 |
| 24 | Narath | 4.61±0.02 | 0.61±0.02 | 1.17±0.05 |
| 25 | Matool | 7.42±0.03 | 0.14±0.03 | 0.49±0.04 |
| 26 | Madayi | 5.89±0.03 | 1.35±0.02 | 0.31±0.05 |
| 27 | Ramanthali | 4.51±0.04 | 0.73±0.04 | 2.99±0.02 |
| 28 | Payyannur Municipality | 4.80±0.03 | 0.36±0.02 | 4.03±0.03 |
| 29 | Karivellur | 4.71±0.04 | 0.16±0.02 | 2.21±0.03 |
| 30 | Nileshwar Municipality | 7.12±0.03 | 0.13±0.03 | 1.26±0.03 |
| 31 | Kanhangad Municipality | 4.44±0.02 | 0.21±0.03 | 0.97±0.04 |
| 32 | Ajanur | 5.05±0.01 | 0.07±0.01 | 4.07±0.04 |
| 33 | Udma | 5.11±0.05 | 0.07±0.02 | 0.80±0.04 |
| 34 | Chemnad | 5.43±0.03 | 0.08±0.02 | 2.25±0.03 |
| 35 | Mogralputhur | 5.49±0.04 | 0.30±0.03 | 2.99±0.03 |
| 36 | Kumbla | 5.60±0.03 | 0.16±0.05 | 3.55±0.04 |
| 37 | Mangalpady | 4.56±0.02 | 0.58±0.03 | 1.30±0.02 |
| 38 | Manjeshwar | 4.39±0.04 | 0.55±0.03 | 4.27±0.03 |
| *Kaipad* lands  (AEU 7) | 1 | Kannapuram | 6.23±0.03 | 0.15±0.03 | 0.69±0.03 |
| 2 | Cherukunnu | 4.71±0.04 | 7.25±0.02 | 0.31±0.03 |
| 3 | Ezhome | 4.76±0.02 | 12.12±0.03 | 2.70±0.04 |
| 4 | Thrikkarippur | 4.20±0.03 | 0.25±0.03 | 0.97±0.03 |
| 5 | Valiyaparamb | 6.11±0.02 | 0.27±0.03 | 1.76±0.01 |
| 6 | Pilicode | 4.25±0.04 | 0.05±0.01 | 3.96±0.04 |
| 7 | Cheruvathur | 7.23±0.02 | 0.14±0.03 | 1.56±0.04 |
| 8 | Pallikkara | 4.98±0.04 | 8.12±0.02 | 2.58±0.02 |

Table 4. Chemical properties (Available N, P and K) of surface (0-15cm) soil samples collected from paddy fields of Northern coastal plain (AEU 2) and *Kaipad* Lands (AEU 7) agro ecological units

| Agro ecological units  (AEU) | Grid No | Local Body | Available N | Available P | Available K |
| --- | --- | --- | --- | --- | --- |
| kgha-1 | | |
| Northern coastal plain  (AEU 2) | 1 | Kodungallur Municipality | 451.58±2.90 | 261.38±0.26 | 306.88±1.94 |
| 2 | Chavakkad Municipality | 1329.66±3.92 | 6.49±0.33 | 498.40±3.00 |
| 3 | Punnayurkulam | 351.232±2.66 | 7.64±0.38 | 59.36±3.52 |
| 4 | Parappanangadi Muncipality | 464.12±2.53 | 36.49±0.98 | 147.84±2.11 |
| 5 | Vallikkunnu | 426.49±1.76 | 8.14±0.39 | 181.44±2.93 |
| 6 | Tanur | 388.86±1.84 | 61.40±0.41 | 109.76±1.37 |
| 7 | Tanalur | 275.96±3.21 | 86.80±0.52 | 66.08±2.07 |
| 8 | Vettam | 250.88±3.03 | 51.54±1.10 | 34.72±2.31 |
| 9 | Tripangode | 401.41±2.16 | 57.70±0.79 | 21.23±2.21 |
| 10 | Feroke Municipality | 464.12±2.47 | 28.60±0.50 | 159.71±3.04 |
| 11 | Ramanattukara Municipality | 627.20±2.44 | 79.40±0.60 | 248.64±2.81 |
| 12 | Thikkoti | 288.51±3.23 | 13.56±0.69 | 122.08±1.04 |
| 13 | Payyoli | 689.92±3.45 | 57.21±1.06 | 241.92±2.94 |
| 14 | Thurayur | 526.84±3.85 | 17.51±1.03 | 163.52±2.29 |
| 15 | Maniyur | 313.60±3.90 | 26.42±0.34 | 75.04±2.95 |
| 16 | Chorodu | 614.65±3.52 | 72.25±0.66 | 20.13±1.93 |
| 17 | Eramala | 150.52±1.95 | 24.41±0.50 | 413.28±2.74 |
| 18 | Panoor | 250.88±2.31 | 79.56±0.55 | 112.00±2.02 |
| 19 | Eranholi | 413.95±3.95 | 6.90±0.12 | 142.24±1.91 |
| 20 | Dharmadam | 263.42±2.42 | 254.48±0.40 | 106.40±2.63 |
| 21 | Chirakkal | 589.56±2.61 | 12.08±0.43 | 172.48±2.56 |
| 22 | Azhikode | 250.88±3.52 | 276.42±0.20 | 209.44±1.73 |
| 23 | Kalliasseri | 163.07±3.63 | 44.88±0.28 | 23.52±3.00 |
| 24 | Narath | 313.6±1.56 | 45.13±0.92 | 40.32±2.54 |
| 25 | Matool | 250.88±1.86 | 133.92±0.60 | 131.04±2.22 |
| 26 | Madayi | 301.05±2.06 | 79.89±1.08 | 127.68±2.58 |
| 27 | Ramanthali | 564.48±1.54 | 30.08±0.88 | 140.00±1.42 |
| 28 | Payyannur Municipality | 790.27±2.93 | 39.95±0.29 | 302.40±3.81 |
| 29 | Karivellur | 526.84±2.21 | 47.10±0.46 | 119.84±1.94 |
| 30 | Nileshwar Municipality | 413.95±1.34 | 71.51±0.96 | 143.36±2.78 |
| 31 | Kanhangad Municipality | 288.51±1.39 | 131.92±0.87 | 133.28±2.85 |
| 32 | Ajanur | 940.8±2.50 | 10.85±0.68 | 69.44±1.30 |
| 33 | Udma | 351.23±0.86 | 9.12±0.28 | 153.44±0.87 |
| 34 | Chemnad | 489.21±2.86 | 51.78±1.10 | 241.92±2.18 |
| 35 | Mogralputhur | 514.3±1.41 | 15.78±0.84 | 95.20±2.77 |
| 36 | Kumbla | 489.21±3.09 | 6.41±0.27 | 48.16±3.56 |
| 37 | Mangalpady | 376.32±2.68 | 18.74±0.54 | 164.64±2.92 |
| 38 | Manjeshwar | 702.46±0.82 | 10.60±0.41 | 212.80±3.31 |
| *Kaipad* lands  (AEU 7) | 1 | Kannapuram | 501.76±2.95 | 11.84±1.04 | 127.68±1.36 |
| 2 | Cherukunnu | 413.95±1.44 | 78.41±0.39 | 23.52±2.68 |
| 3 | Ezhome | 338.68±2.80 | 11.34±0.95 | 2548.00±2.87 |
| 4 | Thrikkarippur | 213.24±0.66 | 16.03±0.77 | 118.72±3.32 |
| 5 | Valiyaparamb | 250.88±2.35 | 68.30±0.48 | 122.08±0.62 |
| 6 | Pilicode | 526.84±1.77 | 12.08±0.57 | 36.96±2.33 |
| 7 | Cheruvathur | 351.23±1.18 | 72.50±0.93 | 21.28±2.38 |
| 8 | Pallikkara | 439.04±3.79 | 12.82±0.42 | 142.24±1.35 |

Table 5. Chemical properties (Available Ca, Mg and S) of surface (0-15cm) soil samples collected from paddy fields of Northern coastal plain (AEU 2) and *Kaipad* Lands (AEU 7) agro ecological units

| Agro ecological units  (AEU) | Grid No | Local Body | Available Ca | Available Mg | Available S |
| --- | --- | --- | --- | --- | --- |
| mg kg-1 | | |
| Northern coastal plain  (AEU 2) | 1 | Kodungallur Municipality | 576.88±1.62 | 100.33±0.71 | 229.17±2.28 |
| 2 | Chavakkad Municipality | 1148.75±4.27 | 120.92±1.31 | 1142.28±2.59 |
| 3 | Punnayurkulam | 636.25±4.27 | 147.17±1.81 | 18.47±2.65 |
| 4 | Parappanangadi Muncipality | 920.63±1.55 | 117.37±3.89 | 53.98±2.44 |
| 5 | Vallikkunnu | 525.63±0.77 | 100.89±2.21 | 231.06±1.06 |
| 6 | Tanur | 301.25±2.52 | 93.11±2.01 | 135.42±2.39 |
| 7 | Tanalur | 149.38±1.93 | 61.89±2.17 | 86.17±1.13 |
| 8 | Vettam | 452.50±3.80 | 74.20±2.49 | 301.14±2.45 |
| 9 | Tripangode | 121.88±1.86 | 105.43±1.62 | 362.22±1.26 |
| 10 | Feroke Municipality | 845.00±3.34 | 61.83±2.40 | 165.72±1.43 |
| 11 | Ramanattukara Municipality | 616.25±1.66 | 63.88±0.87 | 202.65±1.92 |
| 12 | Thikkoti | 171.25±4.02 | 19.34±2.39 | 3.79±0.36 |
| 13 | Payyoli | 802.50±4.16 | 67.11±2.85 | 78.60±0.57 |
| 14 | Thurayur | 326.25±2.47 | 59.34±1.21 | 124.53±1.47 |
| 15 | Maniyur | 265.63±2.56 | 20.40±1.75 | 97.06±2.42 |
| 16 | Chorodu | 195.00±3.99 | 32.59±1.92 | 5.68±0.53 |
| 17 | Eramala | 710.00±3.23 | 158.42±2.19 | 74.34±1.75 |
| 18 | Panoor | 311.25±2.77 | 22.27±1.89 | 13.73±1.59 |
| 19 | Eranholi | 494.38±4.55 | 177.58±2.13 | 12.78±1.52 |
| 20 | Dharmadam | 416.25±3.29 | 22.14±1.34 | 27.46±1.58 |
| 21 | Chirakkal | 296.88±3.41 | 58.65±0.61 | 110.80±1.62 |
| 22 | Azhikode | 440.63±3.70 | 62.95±2.41 | 141.10±2.07 |
| 23 | Kalliasseri | 309.38±1.94 | 27.80±1.14 | 8.52±0.61 |
| 24 | Narath | 591.88±1.26 | 87.64±0.98 | 169.51±1.63 |
| 25 | Matool | 586.25±2.22 | 27.12±0.88 | 22.25±1.00 |
| 26 | Madayi | 434.38±0.57 | 62.01±2.23 | 169.98±0.98 |
| 27 | Ramanthali | 190.00±3.42 | 36.95±1.23 | 26.04±1.34 |
| 28 | Payyannur Municipality | 590.00±3.71 | 124.77±2.38 | 34.09±1.95 |
| 29 | Karivellur | 120.63±3.36 | 32.59±2.20 | 13.26±0.74 |
| 30 | Nileshwar Municipality | 1008.13±1.95 | 179.01±1.48 | 10.89±0.84 |
| 31 | Kanhangad Municipality | 83.75±3.04 | 17.17±1.90 | 55.87±0.25 |
| 32 | Ajanur | 135.00±1.89 | 76.63±2.52 | 4.73±0.50 |
| 33 | Udma | 240.00±1.41 | 77.19±2.51 | 5.21±0.41 |
| 34 | Chemnad | 216.25±1.93 | 67.24±2.29 | 7.10±0.51 |
| 35 | Mogralputhur | 263.13±3.08 | 66.49±1.21 | 6.63±0.44 |
| 36 | Kumbla | 445.00±3.84 | 228.71±2.42 | 2.84±0.37 |
| 37 | Mangalpady | 354.38±2.47 | 122.35±2.93 | 142.05±1.95 |
| 38 | Manjeshwar | 331.25±1.36 | 134.79±1.52 | 67.23±0.74 |
| *Kaipad* lands  (AEU 7) | 1 | Kannapuram | 562.50±2.42 | 262.30±4.05 | 12.31±0.63 |
| 2 | Cherukunnu | 555.63±1.20 | 128.57±2.35 | 191.76±2.14 |
| 3 | Ezhome | 3805.02±6.45 | 1403.91±3.46 | 1241.53±1.68 |
| 4 | Thrikkarippur | 86.25±1.46 | 34.46±2.26 | 52.56±1.07 |
| 5 | Valiyaparamb | 650.00±4.40 | 36.20±2.83 | 53.03±1.66 |
| 6 | Pilicode | 60.00±2.62 | 35.52±2.29 | 2.37±0.38 |
| 7 | Cheruvathur | 955.00±3.29 | 192.51±2.65 | 7.58±0.35 |
| 8 | Pallikkara | 98.13±4.26 | 39.00±2.17 | 5.68±0.38 |

Table 6. Chemical properties (Available Fe, Mn and As) of surface (0-15cm) soil samples collected from paddy fields of Northern coastal plain (AEU 2) and *Kaipad* Lands (AEU 7) agro ecological units

| Agro ecological units  (AEU) | Grid No | Local Body | Available Fe | Available Mn | Available As |
| --- | --- | --- | --- | --- | --- |
| mg kg-1 | | µg kg-1 |
| Northern coastal plain  (AEU 2) | 1 | Kodungallur Municipality | 292.30±3.88 | 46.72±0.53 | 23.08±0.85 |
| 2 | Chavakkad Municipality | 539.70±4.50 | 71.82±0.37 | 381.69±7.56 |
| 3 | Punnayurkulam | 241.30±1.39 | 25.68±0.59 | 260.53±3.54 |
| 4 | Parappanangadi Muncipality | 263.60±1.94 | 11.69±0.50 | 656.11±9.50 |
| 5 | Vallikkunnu | 132.40±2.86 | 4.40±0.41 | 832.87±3.21 |
| 6 | Tanur | 275.10±2.29 | 12.30±0.79 | 228.20±5.27 |
| 7 | Tanalur | 281.90±1.56 | 2.89±0.36 | 21.54±1.07 |
| 8 | Vettam | 312.80±1.08 | 23.49±0.52 | 5.86±0.22 |
| 9 | Tripangode | 355.40±1.61 | 10.69±0.60 | 139.06±4.67 |
| 10 | Feroke Municipality | 406.40±2.13 | 13.56±0.32 | 433.75±9.62 |
| 11 | Ramanattukara Municipality | 310.70±1.69 | 7.83±0.14 | 229.84±5.18 |
| 12 | Thikkoti | 330.40±2.46 | 21.34±0.31 | 171.76±5.83 |
| 13 | Payyoli | 380.10±1.62 | 9.94±0.65 | 318.01±3.97 |
| 14 | Thurayur | 310.20±1.26 | 14.87±0.57 | 272.35±4.72 |
| 15 | Maniyur | 264.20±1.13 | 10.96±0.60 | 75.85±1.43 |
| 16 | Chorodu | 410.40±1.64 | 54.20±0.93 | 0.67±0.76 |
| 17 | Eramala | 234.20±1.62 | 25.63±0.36 | 3.51±0.85 |
| 18 | Panoor | 242.42±1.97 | 17.09±0.54 | 4.60±1.37 |
| 19 | Eranholi | 283.20±2.25 | 21.34±0.31 | 150.58±2.25 |
| 20 | Dharmadam | 361.00±1.18 | 34.94±1.61 | 6.84±0.90 |
| 21 | Chirakkal | 310.20±2.16 | 31.03±1.53 | 267.29±4.48 |
| 22 | Azhikode | 401.40±3.33 | 37.49±0.99 | 24.68±5.35 |
| 23 | Kalliasseri | 430.20±2.42 | 48.59±1.39 | 14.05±2.11 |
| 24 | Narath | 308.10±1.24 | 9.63±1.03 | 148.89±2.84 |
| 25 | Matool | 356.50±1.75 | 44.65±1.14 | 96.28±8.24 |
| 26 | Madayi | 291.3±2.16 | 37.83±0.40 | 170.82±3.81 |
| 27 | Ramanthali | 288.50±4.82 | 10.37±0.53 | 315.48±3.24 |
| 28 | Payyannur Municipality | 294.20±1.81 | 15.88±1.33 | 131.30±1.89 |
| 29 | Karivellur | 384.50±2.31 | 26.78±0.55 | 186.47±6.58 |
| 30 | Nileshwar Municipality | 210.20±1.56 | 17.48±0.37 | 546.14±3.74 |
| 31 | Kanhangad Municipality | 304.20±5.36 | 0.08±0.02 | 331.69±0.98 |
| 32 | Ajanur | 271.30±2.65 | 12.47±0.99 | 210.00±1.66 |
| 33 | Udma | 281.30±3.15 | 12.95±0.32 | 316.69±5.04 |
| 34 | Chemnad | 300.10±4.26 | 26.71±1.56 | 28.53±5.36 |
| 35 | Mogralputhur | 338.10±1.72 | 7.73±0.53 | 3.14±0.20 |
| 36 | Kumbla | 184.50±1.24 | 0.08±0.02 | 786.56±13.17 |
| 37 | Mangalpady | 321.30±1.87 | 0.76±0.04 | 363.81±5.13 |
| 38 | Manjeshwar | 298.10±2.71 | 16.73±1.05 | BDL |
| *Kaipad* lands  (AEU 7) | 1 | Kannapuram | 330.80±2.85 | 24.61±0.92 | 24.84±2.65 |
| 2 | Cherukunnu | 321.80±2.04 | 9.41±0.48 | 54.37±1.80 |
| 3 | Ezhome | 573.70±4.61 | 16.70±0.92 | 68.10±4.15 |
| 4 | Thrikkarippur | 321.40±2.44 | 20.01±0.64 | 8.47±1.34 |
| 5 | Valiyaparamb | 289.30±2.24 | 3.25±0.54 | 208.69±6.52 |
| 6 | Pilicode | 378.30±3.03 | 4.98±0.06 | 0.58±0.56 |
| 7 | Cheruvathur | 287.10±2.46 | 33.39±0.55 | 59.57±5.15 |
| 8 | Pallikkara | 104.30±2.49 | 16.57±0.44 | 1255.20±18.85 |
